# Supplementary material for: Ectopic expression of a bacterial mercury transporter MerC in root epidermis for efficient mercury accumulation in shoots of Arabidopsis plants
Source: PubMed Central journal article supplement (PMC6416403; doi:10.1038/s41598-019-40671-x), 2019-03-13
Supplement: 41598_2019_40671_MOESM1_ESM.pdf [file 41598_2019_40671_MOESM1_ESM.pdf]

## **Supplementary information**

**Ectopic expression of a bacterial mercury transporter MerC in root epidermis for efficient mercury accumulation in shoots of Arabidopsis plants**

**Shimpei Uraguchi<sup>1</sup>, Yuka Sone<sup>1</sup>, Minami Kamezawa<sup>1</sup>, Michi Tanabe<sup>1</sup>, Momoko Hirakawa<sup>1</sup>, Ryosuke Nakamura<sup>1</sup>, Yasukazu Takanezawa<sup>1</sup>, Masako Kiyono<sup>1\*</sup>**

**<sup>1</sup> Department of Public Health, School of Pharmacy, Kitasato University, 5-9-1 Shirokane, Minato-ku, Tokyo 108-8641, Japan**

Table S1 List of primers used in the study

| Primer set for       |               | Primer name  | Primer sequence (5' to 3')          |
|----------------------|---------------|--------------|-------------------------------------|
| Plasmid construction | promoter      | Sbf1-pEpi_Fw | aattcctgcaggGTTGTGTTGTATATTGTTG     |
|                      |               | Xba1-pEpi_Rv | ctagtctagaTAGCTAGCTAATGGTAGA        |
|                      | mTRQ2         | XFPs_Fw      | caccATGGTGAGCAAGGGCGAG              |
|                      |               | XFPs_Rv      | ggctcctcctcctccCTTGTACAGCTCGTCCATGC |
|                      | merC-SYP121   | merC_Fw      | ggaggaggaggagccATGGGACTGATGACACGC   |
|                      |               | SYP121_Rv    | TCAACGCAATAGACGCCTTG                |
| Genotyping           | T-DNA         | XFPs_Fw      | caccATGGTGAGCAAGGGCGAG              |
|                      |               | merC_Rv2     | TTTTATCGGCAATGCGTGTC                |
|                      | <i>AtEF1a</i> | AtEF1a Fw    | AGCACGCTCTTCTTGCTTTC                |
|                      |               | AtEF1a Rv    | AACGCCTGTCAATCTTGGTC                |
|                      |               |              |                                     |
| Real-time PCR        | <i>merC</i>   | merC Fw2     | CTTCTTGAGCCAGTACGAGG                |
|                      |               | merC Rv3     | GCCATTGCCGATGACTGAAC                |
|                      | <i>AtEF1a</i> | AtEF1a Fw2   | TGCCACACCTCTCACATTGC                |
|                      |               |              |                                     |
|                      |               | AtEF1a Rv2   | CAACGCCTGTCAATCTTGGTC               |

Lowercase sequences indicate additional sequences for restriction enzyme digestion (promoter), TOPO-directional cloning (XFPs\_Fw) or adding linker sequences (XFPs\_Rv and merC\_Fw).

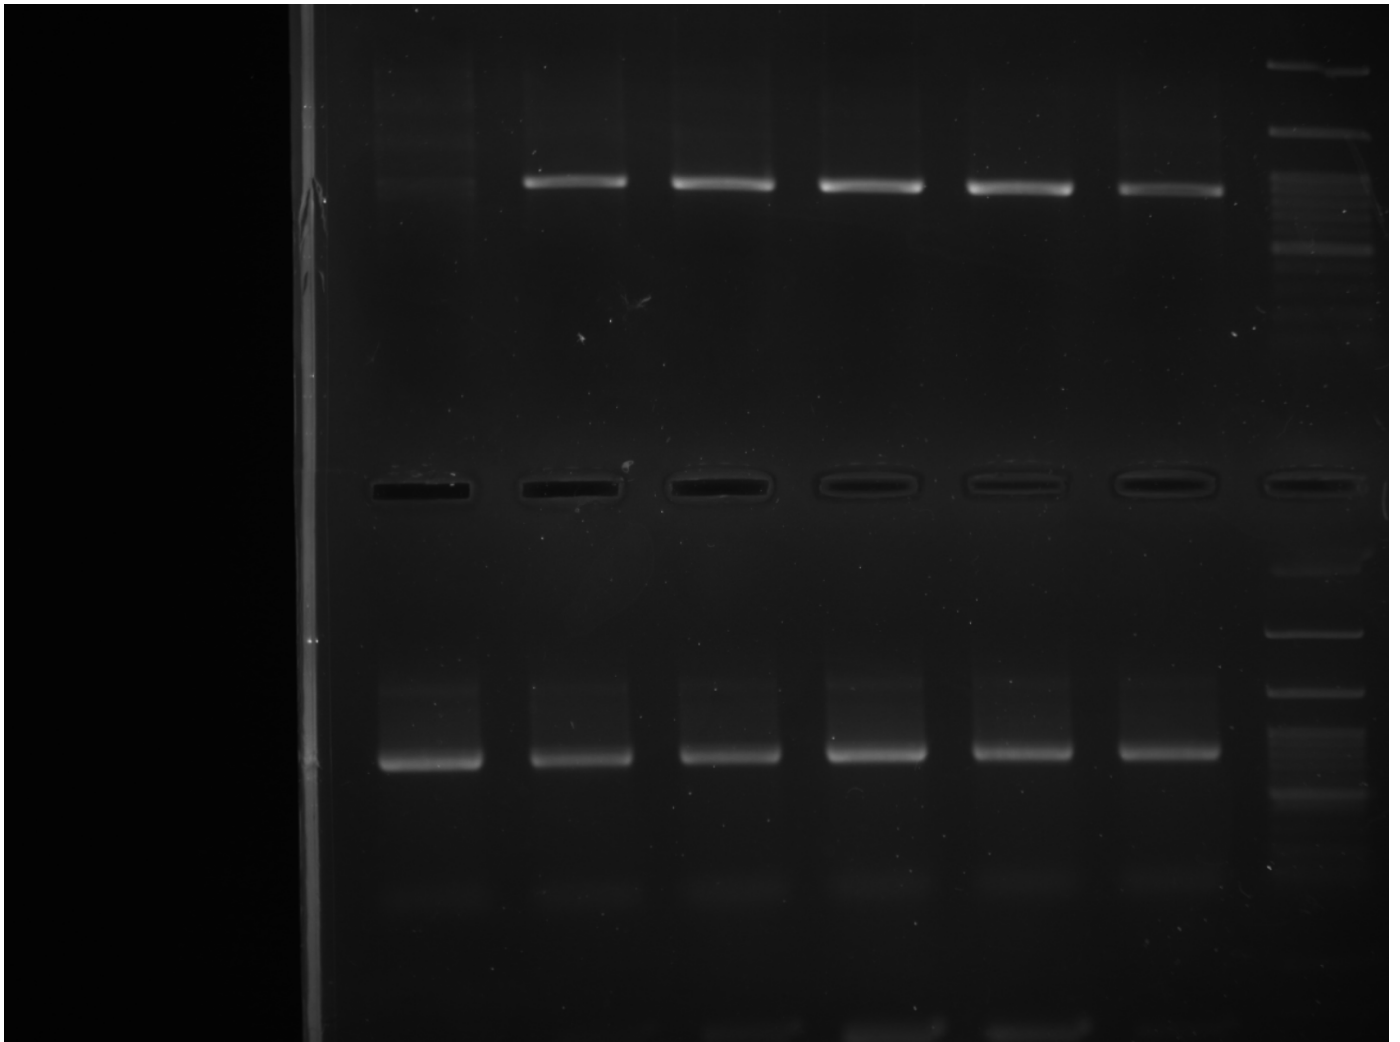

Supplementary Fig. 1 Full-length image of agarose gel used for Figure 2 b.

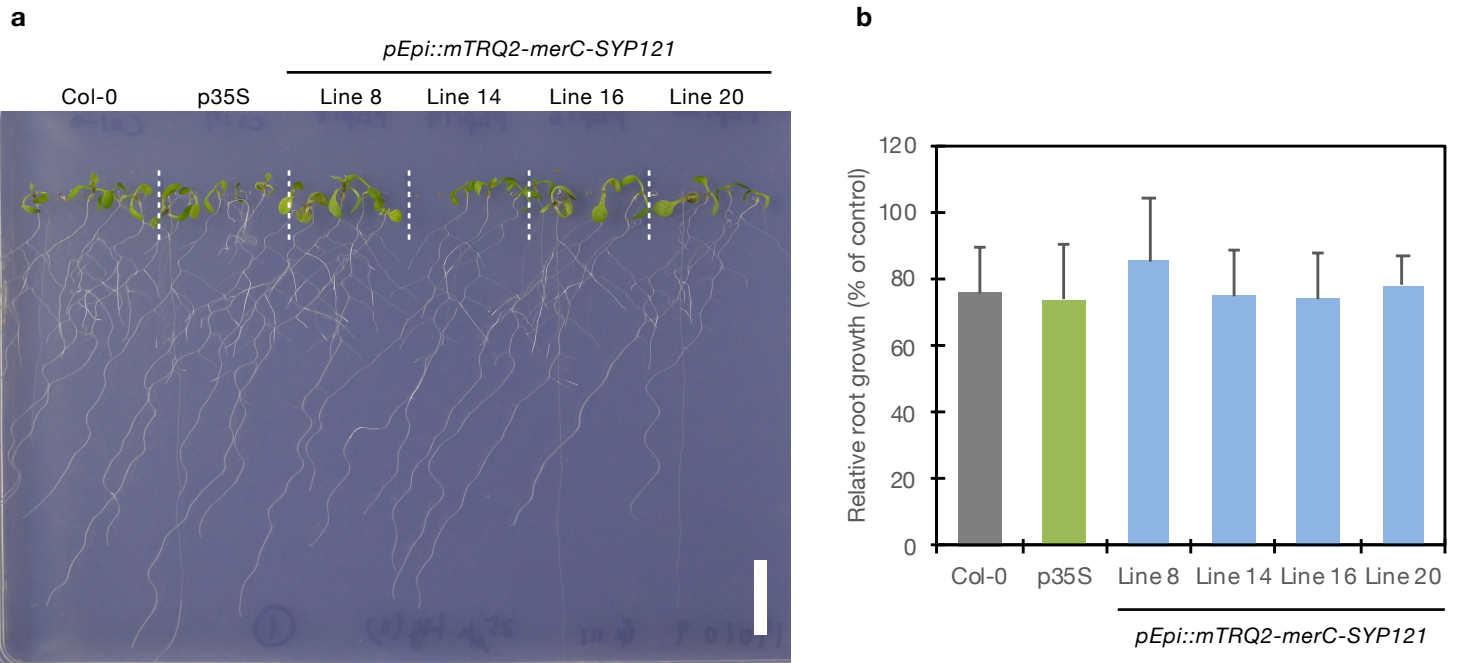

Supplementary Fig. 2 Hg(II) sensitivity assay of the pEpi plants.

**a** Phenotypes of Col-0, p35S, and the pEpi lines grown on the agar medium containing 25  $\mu$ M Hg(II) for 12 d. Scale bar = 1 cm. **b** Relative primary root length of the seedlings grown on the agar medium containing 25  $\mu$ M Hg(II) for 12 d. Values are shown as a percentage of each control. Data represent means with the SD from two independent experiments ( $n = 14-27$ ). There is no significant difference between Col-0 and the transgenic lines according to Student's t test.



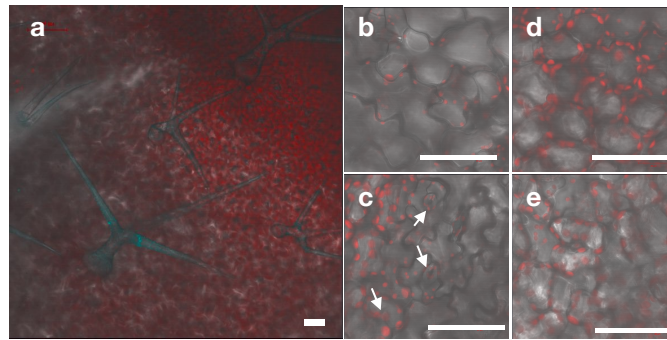

Supplementary Fig. 3 Microscopic analyses of mTRQ2-MerC-SYP121 expression in leaves of the pEpi plants (Line 16). **a** upper epidermis and trichomes. **b** upper epidermis. **c** Lower epidermis and stomata (indicated with white arrows). **d** Upper mesophyll. **e** Lower mesophyll. Red signal indicates autofluorescence of chloroplast. Scale bars = 50  $\mu$ m.
